# Supplementary material for: Feasibility of magnetic resonance imaging compilation (MAGIC) for evaluating the depth of myometrial invasion and predicting the pathological subtypes of endometrial cancer: A comparison with high resolution T2WI and DWI
Source: Research Square preprint supplement (doi:10.21203/rs.3.rs-7818425/v1), 2025-10-30
Supplement: Supplementary file 1 [file c0051bf1c163c05cd9c126a7.docx]

| Supplementary table 1 The image quality scores for sy-T2WI and hr-T2WI | |
| --- | --- |
| Sharpness of the lesion edge |  |
| 5 | Sharp, no blurring |
| 4 | Mild blurring |
| 3 | Moderate blurring |
| 2 | Severe blurring |
| 1 | Not Diagnostic |
| Lesion conspicuity |  |
| 5 | excellent contrast of lesion |
| 4 | easy to detect |
| 3 | recognizable |
| 2 | minimally perceivable |
| 1 | difficult to find |
| Motion artifacts |  |
| 5 | No Artifacts |
| 4 | Mild Artifacts |
| 3 | Moderate artifacts |
| 2 | Severe artifacts |
| 1 | Not Diagnostic |
| Overall image quality |  |
| 5 | Excellent |
| 4 | Good, not affecting interpretation |
| 3 | Moderate, potentially affecting interpretation |
| 2 | Poor, definitely affecting interpretation |
| 1 | Not Diagnostic |
